# Supplementary material for: UA-Zero as a Uranyl Acetate Replacement When Diagnosing Primary Ciliary Dyskinesia by Transmission Electron Microscopy
Source: MDPI journal article supplement (doi:10.3390/diagnostics11061063), 2021-06-09
Supplement: s1 [file s1]

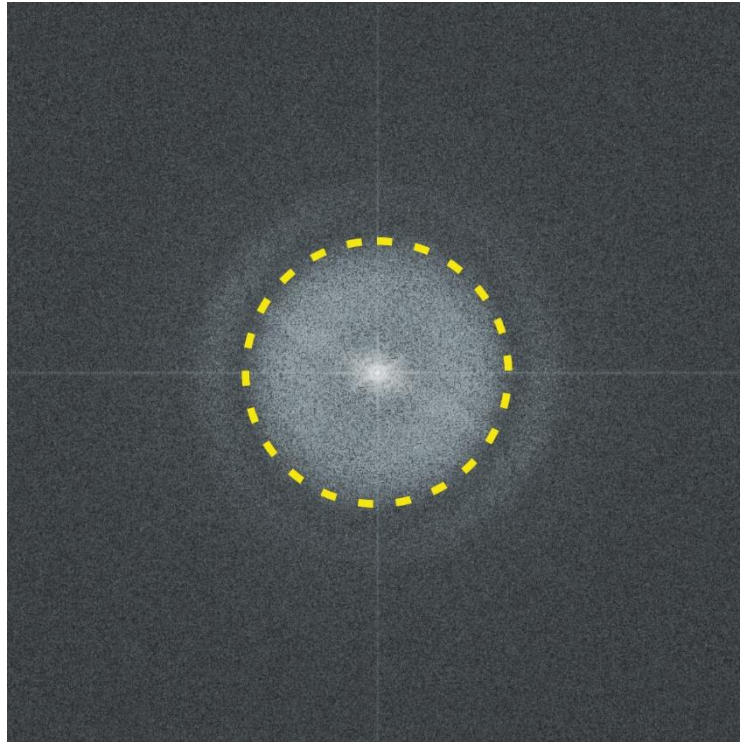

**Supplementary Figure S1.** Representative fast Fourier transform (FFT) used to set the defocus of images acquired for the survey. All images were acquired with a defocus of  $0.7\mu\text{m}$  avoiding beam astigmatism and sample drift.
